# Supplementary material
Source: MDPI journal article supplement (https://www.mdpi.com/2673-6004/5/1/3)
Supplement: s1 [file s1]

Figure S1. Pictures of urban parks of the six cities in central Argentina.

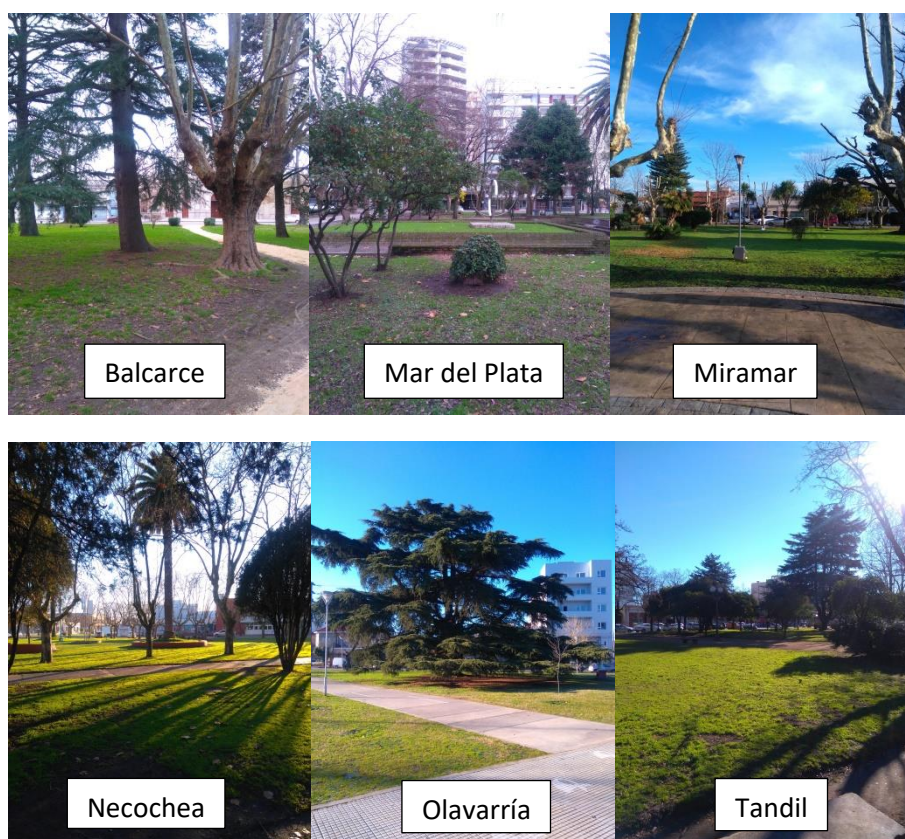

Figure S2. Sample coverage in relation to the individuals registered. Shaded areas indicate 95% confidence intervals.

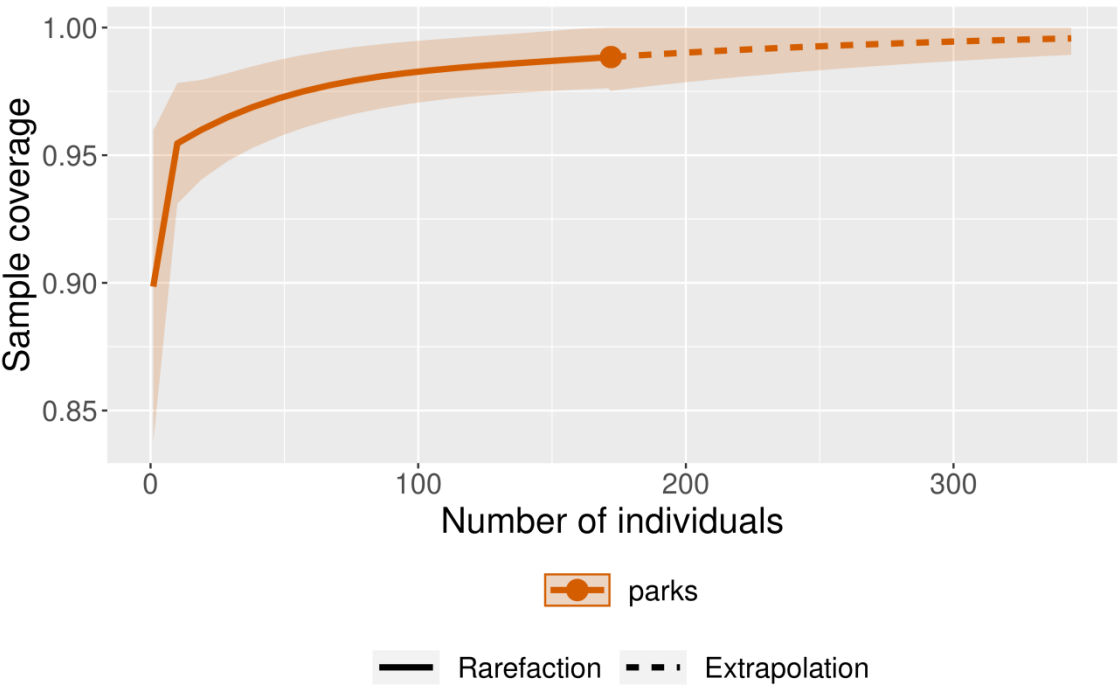

Table S1. Description of cities surveyed.

| City          | Parks surveyed | Point counts | Population |
|---------------|----------------|--------------|------------|
| Necochea      | 5              | 10           | 92933      |
| Miramar       | 6              | 8            | 29629      |
| Mar del Plata | 15             | 22           | 860000     |
| Balcarce      | 7              | 8            | 38823      |
| Tandil        | 9              | 12           | 116967     |
| Olavarría     | 9              | 11           | 89721      |
